# Supplementary material for: The Role of Emotion Dysregulation and Distress Tolerance in the Relationship Between Childhood Trauma and Borderline Personality Disorder Symptomatology Among College Students: A Chain Mediated Model Analysis
Source: Research Square preprint supplement (doi:10.21203/rs.3.rs-8805479/v1), 2026-02-23
Supplement: Supplementary file 1 [file b6b6852b6c67b19529fe5e2e.docx]

**Table 1|| Normality, Internal Consistency and Average Inter-Item Correlations in the Study Variables (n = 306)**

| **Variables** | **M** | **SD** | **Skewness** | | **Kurtosis** | | **Cronbach's α** | **Inter-Item r** |
| --- | --- | --- | --- | --- | --- | --- | --- | --- |
| **Statistic** | **SE** | **Statistic** | **SE** |
| **EN** | 11.28 | 5.35 | 0.51 | 0.14 | -0.78 | 0.28 | **0.87** | 0.59 |
| **EA** | 10.28 | 4.71 | 0.91 | 0.14 | 0.10 | 0.28 | **0.84** | **0.50** |
| **PA** | 8.07 | 4.01 | 1.62 | 0.14 | 2.24 | 0.28 | **0.82** | **0.46** |
| **PN** | 7.21 | 2.92 | 1.56 | 0.14 | 1.84 | 0.28 | 0.66 | **0.30** |
| **SA** | 7.96 | 4.93 | 1.88 | 0.14 | 2.79 | 0.28 | **0.92** | 0.69 |
| **CT** | 44.79 | 16.34 | 1.03 | 0.14 | 0.78 | 0.28 | **0.92** | **0.31** |
| **DT** | 48.19 | 11.73 | -0.31 | 0.14 | -0.08 | 0.28 | **0.89** | **0.30** |
| **ED** | 44.04 | 12.88 | 0.34 | 0.14 | -0.47 | 0.28 | **0.91** | **0.33** |
| **BPD** | 1.10 | 0.98 | 0.87 | 0.14 | -0.30 | 0.28 | **0.97** | 0.55 |

Note: EA = Emotional Abuse; EN = Emotional Neglect; PA = Physical Abuse; PN = Physical Neglect; SA = Sexual Abuse; CT = Childhood Trauma; DT = Distress Tolerance; ED = Emotion Dysregulation; BPD = Borderline Personality Disorder; M = Mean; SD = Standard Deviation

**Table 2|| Prevalence** **of Childhood Trauma Types Experienced (N = 306)**

| **Number of Childhood Trauma** | **Prevalence % (n)** |
| --- | --- |
| At least 1 trauma type | 56.2% (172) |
| At least 2 trauma types | 35.3% (108) |
| At least 3 trauma types | 21.9% (67) |
| At least 4 trauma types | 10.8% (33) |
| All 5 trauma types | 3.9% (12) |

**Table 3|| Comparison of Childhood Trauma, Emotion Dysregulation and Distress Tolerance for BPD and Non-BPD Groups (n = 306)**

| **Variables** | **BPD (n = 87)**  **Mean ± SD** | **Non-BPD (n = 219)**  **Mean ± SD** | **T** | **P** | **Cohen's d** |
| --- | --- | --- | --- | --- | --- |
| **EA** | 13.58 ± 5.01 | 8.96 ± 3.87 | 8.621 | <0.001 | 1.09 |
| **EN** | 13.89 ± 5.53 | 10.24 ± 4.91 | 5.377 | <0.001 | 0.72 |
| **PA** | 10.26 ± 5.10 | 7.19 ± 3.07 | 6.440 | <0.001 | 0.82 |
| **PN** | 8.17 ± 3.45 | 6.82 ± 2.59 | 3.725 | <0.001 | 0.47 |
| **SA** | 10.02 ± 5.75 | 7.14 ± 4.30 | 4.774 | <0.001 | 0.61 |
| **CT** | 55.94 ± 18.28 | 40.36 ± 13.12 | 8.326 | <0.001 | 1.06 |
| **DT** | 40.98 ± 11.33 | 51.05 ± 10.62 | -7.129 | <0.001 | 0.93 |
| **ED** | 54.73 ± 11.44 | 39.78 ± 10.80 | 10.470 | <0.001 | 1.36 |

Note: EA = Emotional Abuse; EN = Emotional Neglect; PA = Physical Abuse; PN = Physical Neglect; SA = Sexual Abuse; CT = Childhood Trauma; DT = Distress Tolerance; ED = Emotion Dysregulation; BPD = Borderline Personality Disorder

**Table 4|| Stepwise Regression Analysis Predicting Borderline Personality Disorder from Emotional Abuse and Sexual Abuse**

| **Predictor** | **β** | **t** | **p** | **F** | **R2** | **P** | **Durbin- Watson** |
| --- | --- | --- | --- | --- | --- | --- | --- |
| **EA** | 0.444 | 8.664 | < 0.001 | 59.928 | 0.283 | < 0.001 | 2.169 |
| **SA** | 0.185 | 3.610 | < 0.001 |

Note: Dependent Variable = Borderline Personality Disorder, EA = Emotional Abuse, SA = Sexual Abuse

**Table 5|| Stepwise Regression Analysis Predicting Borderline Personality Disorder from Overall Childhood Trauma, Emotion Dysregulation and Distress Tolerance**

| **Predictor** | **β** | **t** | **p** | **F** | **R2** | **P** | **Durbin- Watson** |
| --- | --- | --- | --- | --- | --- | --- | --- |
| **ED** | 0.428 | 8.761 | < 0.001 | 86.748 | 0.463 | < 0.001 | 2.057 |
| **CT** | 0.290 | 6.217 | < 0.001 |
| **DT** | -0.146 | -2.910 | 0.004 |

Note: Dependent Variable = Borderline Personality Disorder, ED = Emotion Dysregulation, DT = Distress Tolerance, CT = Childhood Trauma

**Table 6|| Serial Mediation Analysis Results for Overall Childhood Trauma on Borderline Personality Disorder Symptoms after controlling for age and Gender (n = 306)**

| **Effect** | **Model** | **β** | **T** | **P** | **CI 95%** | | **Effect Ratio %** |
| --- | --- | --- | --- | --- | --- | --- | --- |
| **LLCI** | **ULCI** |
| **Direct Effect** | CT → BPD | 0.0174 | 6.22 | <0.001 | 0.0119 | 0.0230 | 59.0 % |
| **Indirect Effect** | Ind1 | 0.0085 | 5.95 | <0.05 | 0.0052 | 0.0121 | 29.0 % |
|  | Ind2 | 0.0023 | 2.09 | <0.05 | 0.0004 | 0.0047 | 8.0 % |
|  | Ind3 | 0.0011 | 2.20 | <0.05 | 0.0011 | 0.0005 | 4.0 % |
|  | (C1) | 0.0062 | 2.58 | <0.05 | 0.0016 | 0.0110 |  |
|  | (C2) | 0.0074 | 3.89 | <0.05 | 0.0040 | 0.0112 |  |
|  | (C3) | 0.0012 | 1.33 | >0.05 | -0.0002 | 0.0032 |  |
| **Total Indirect Effect** |  | 0.0119 | 5.95 | <0.05 | 0.0081 | 0.0160 | 41.0% |
| **Total Effect** |  | 0.0293 | 9.75 | <0.001 | 0.0234 | 0.0353 | 100 |

**Table 7|| Serial Mediation Analysis Results for Sexual Abuse on Borderline Personality Disorder Symptoms after controlling for age and Gender (n = 306)**

| **Effect** | **Model** | **β** | **T** | **P** | **CI 95%** | | **Effect Ratio %** |
| --- | --- | --- | --- | --- | --- | --- | --- |
| **LLCI** | **ULCI** |
| **Direct Effect** | SA → BPD | 0.0397 | 4.37 | <0.001 | 0.0219 | 0.0576 | 61% |
| **Indirect Effect** | Ind1 | 0.0145 | 2.54 | <0.05 | 0.0039 | 0.0263 | 22% |
|  | Ind2 | 0.0080 | 2.22 | <0.05 | 0.0020 | 0.0163 | 13% |
|  | Ind3 | 0.0023 | 1.91 | <0.05 | 0.0004 | 0.0052 | 4% |
|  | (C1) | 0.0065 | 0.91 | >0.05 | -0.0070 | 0.0206 |  |
|  | (C2) | 0.0122 | 2.39 | <0.05 | 0.0031 | 0.0232 |  |
|  | (C3) | 0.0057 | 1.80 | <0.05 | 0.0005 | 0.0133 |  |
| **Total Indirect Effect** |  | 0.0249 | 3.41 | <0.05 | 0.0108 | 0.0394 | 39% |
| **Total Effect** |  | 0.0646 | 5.97 | <0.001 | 0.0434 | 0.0859 | 100% |

**Table 8|| Serial Mediation Analysis Results for Emotional Abuse on Borderline Personality Disorder Symptoms after controlling for age and Gender (n = 306)**

| **Effect** | **Model** | **β** | **T** | **P** | **CI 95%** | | **Effect Ratio %** |
| --- | --- | --- | --- | --- | --- | --- | --- |
| **LLCI** | **ULCI** |
| **Direct Effect** | EA → BPD | 0.0627 | 6.54 | <0.001 | 0.0438 | 0.0815 | 60% |
| **Indirect Effect** | Ind1 | 0.0299 | 4.74 | <0.05 | 0.0186 | 0.0428 | 28% |
|  | Ind2 | 0.0070 | 2.12 | <0.05 | 0.0016 | 0.0143 | 7% |
|  | Ind3 | 0.0048 | 2.40 | <0.05 | 0.0013 | 0.0091 | 5% |
|  | (C1) | 0.0229 | 2.93 | <0.05 | 0.0082 | 0.0386 |  |
|  | (C2) | 0.0251 | 3.80 | <0.05 | 0.0131 | 0.0390 |  |
|  | (C3) | 0.0021 | 0.75 | >0.05 | -0.0027 | .0083 |  |
| **Total Indirect Effect** |  | 0.0417 | 5.87 | <0.05 | 0.0285 | 0.0562 | 40% |
| **Total Effect** |  | 0.1044 | 10.07 | <0.001 | 0.0840 | 0.1247 | 100% |
